# Supplementary material for: Feature selection environment for genomic applications
Source: Springer Nature journal article supplement (doi:10.1186/1471-2105-9-451), 2008-10-22

ScatterPlot of the features: 23 x 7

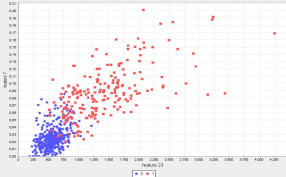

Supplement: 12859_2008_2436_MOESM7_ESM.pdf [file 12859_2008_2436_MOESM7_ESM.pdf]
